# Supplementary material for: HMGA1 orchestrates chromatin compartmentalization and sequesters genes into 3D networks coordinating senescence heterogeneity
Source: Research Square preprint supplement (doi:10.21203/rs.3.rs-3621476/v1), 2024-02-16
Supplement: Supplementary file 1 [file 84fa0d4d89c3ffdc5c61d45b.xlsx]

## Sheet: Sheet1
Primers:
HMGA1 exon 3 primer fwd: AAGCTGATTAGGGCCAACGG,
HMGA1 exon 3 primer rev: CATCTAAAGAGCCAGGGGCAAT,
HMGA1 exon 4 primer fwd: CTAGGGGTCTTCTGGGCTCT,
HMGA1 exon 4 primer rev:CAGGGTGACCCAACACTCTC.
The eight pseudogenes for HMGA1 were also amplified using
primer fwd: GAGCTCGAAGTCCAGCCAG and
primer rev: TGGCAGCACCCTTGTTTTTG.
Guide ID	Guide Name	HMGA1 Exon	Target sequence 5' > 3'	PAM	Target Strand
Sg199	HMGA1 Exon 3	3	GCTGCTTGCGCGGCCTGCCC	CGG	-
Sg202	HMGA1 Exon 4	4	CTTAGGTGTTGGCACTTCGC	TGG	-
